# Supplementary material
Source: MDPI journal article supplement (https://www.mdpi.com/2227-9040/10/11/477)
Supplement: s1 [file s1]

*Supporting Information*

# **Rational Design of Ratiometric Fluorescent Probe for Zn<sup>2+</sup> Imaging under Oxidative Stress in Cells**

**Yaheng Li**<sup>1,2</sup>, **Shankun Yao**<sup>1,2</sup>, **Hongbao Fang**<sup>1,2</sup>, **Wei Jiang He**<sup>1,2,3</sup>, **Yuncong Chen**<sup>1,2,3,\*</sup>, and **Zijian Guo**<sup>1,2,3,\*</sup>

<sup>1</sup> State Key Laboratory of Coordination Chemistry Coordination Chemistry, School of Chemistry and Chemical Engineering, Nanjing University, Nanjing 210023, China

<sup>2</sup> Chemistry and Biomedicine Innovation Center (ChemBIC), Nanjing University, Nanjing 210023, China

<sup>3</sup> Nanchuang (Jiangsu) Institute of Chemistry and Health, Nanjing 210000, China

\* Correspondence: chenyc@nju.edu.cn (Y.C.); zguo@nju.edu.cn (Z.G.)

## Contents

|                  |    |
|------------------|----|
| Figure S1 .....  | 3  |
| Figure S2 .....  | 3  |
| Figure S3 .....  | 4  |
| Figure S4 .....  | 4  |
| Figure S5 .....  | 5  |
| Figure S6 .....  | 5  |
| Figure S7 .....  | 6  |
| Figure S8 .....  | 6  |
| Figure S9 .....  | 7  |
| Figure S10 ..... | 7  |
| Figure S11 ..... | 8  |
| Figure S12 ..... | 8  |
| Figure S13 ..... | 9  |
| Figure S14 ..... | 9  |
| Figure S15 ..... | 10 |
| Figure S16 ..... | 10 |
| Figure S17 ..... | 11 |
| Figure S18 ..... | 11 |
| Figure S19 ..... | 12 |
| Figure S20 ..... | 12 |
| Figure S21 ..... | 13 |
| Figure S22 ..... | 13 |
| Figure S23 ..... | 14 |
| Figure S24 ..... | 14 |
| Figure S25 ..... | 15 |

lyh-113 #12 RT: 0.11 AV: 1 NL: 3.41E7  
T: FTMS + p ESI Full ms [200.0000-750.0000]

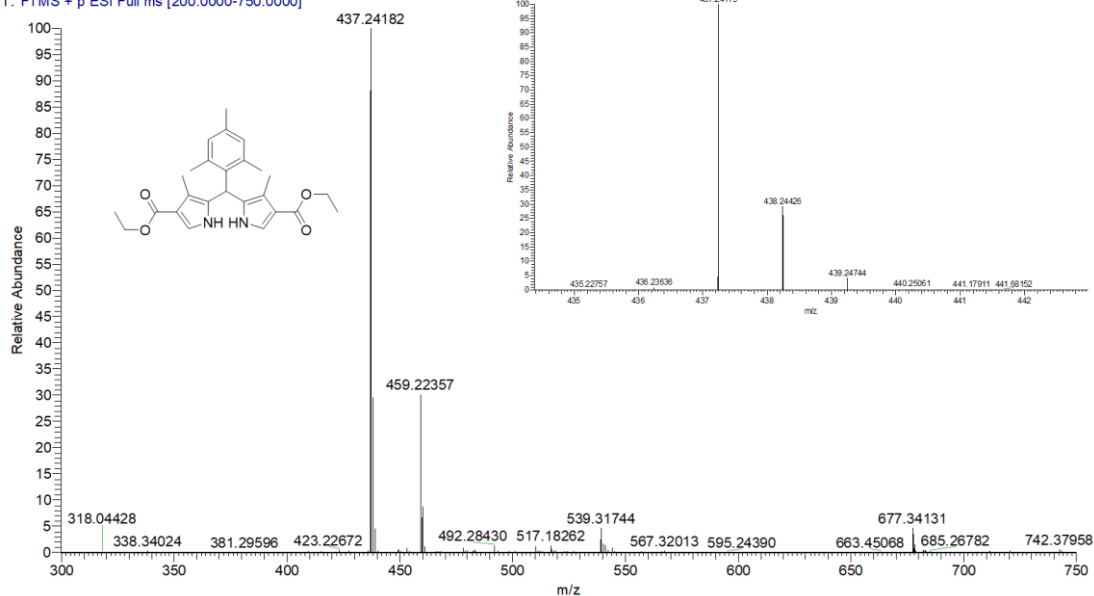

Figure S1. ESI-MS spectra of 1

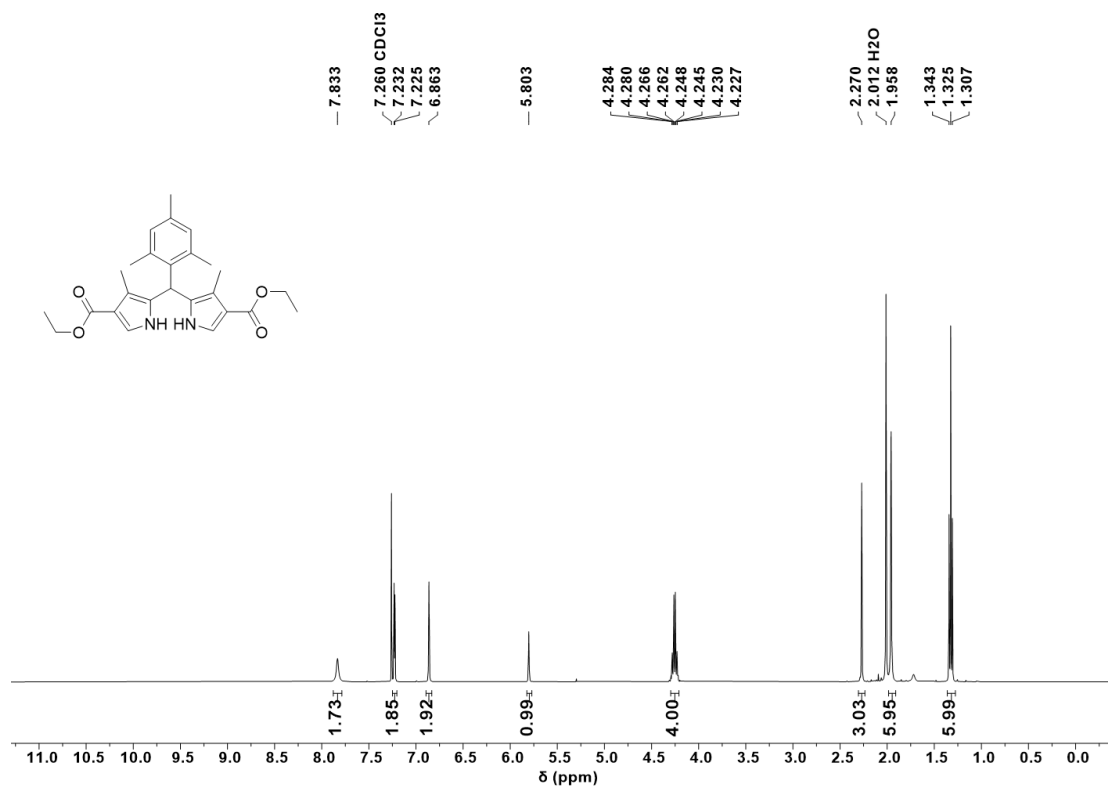

Figure S2. <sup>1</sup>H NMR spectra of 1

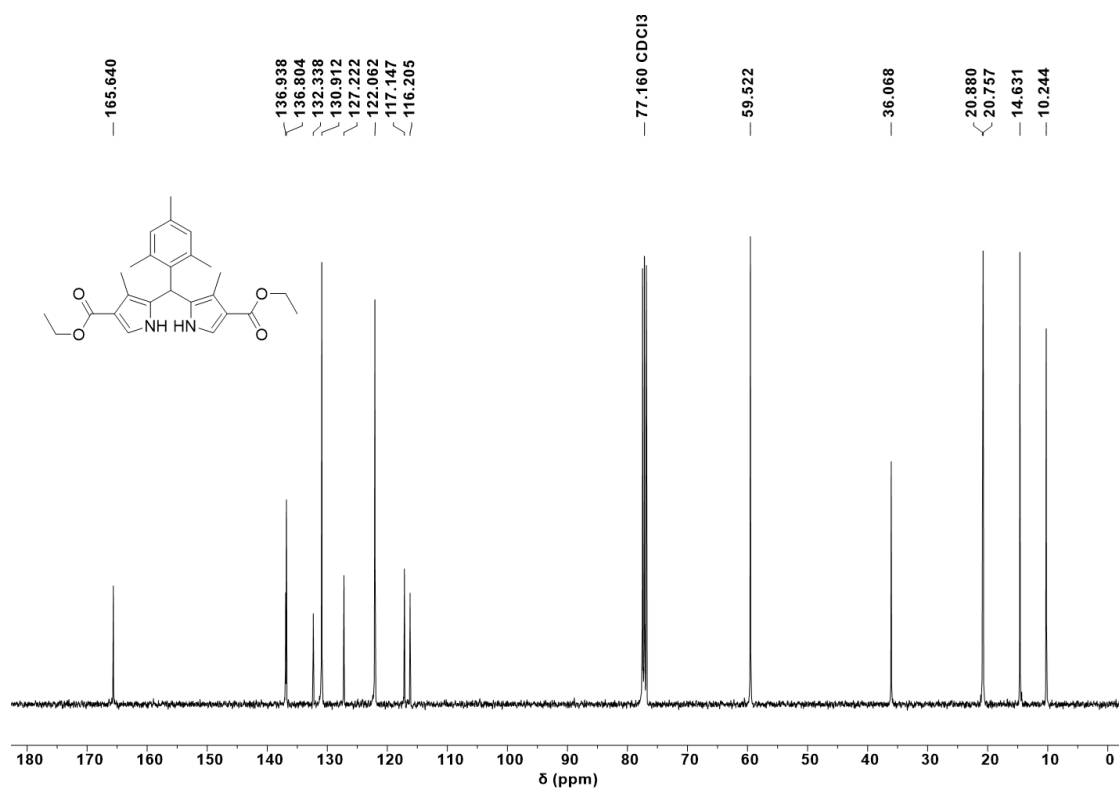

Figure S3. <sup>13</sup>C NMR spectra of 1

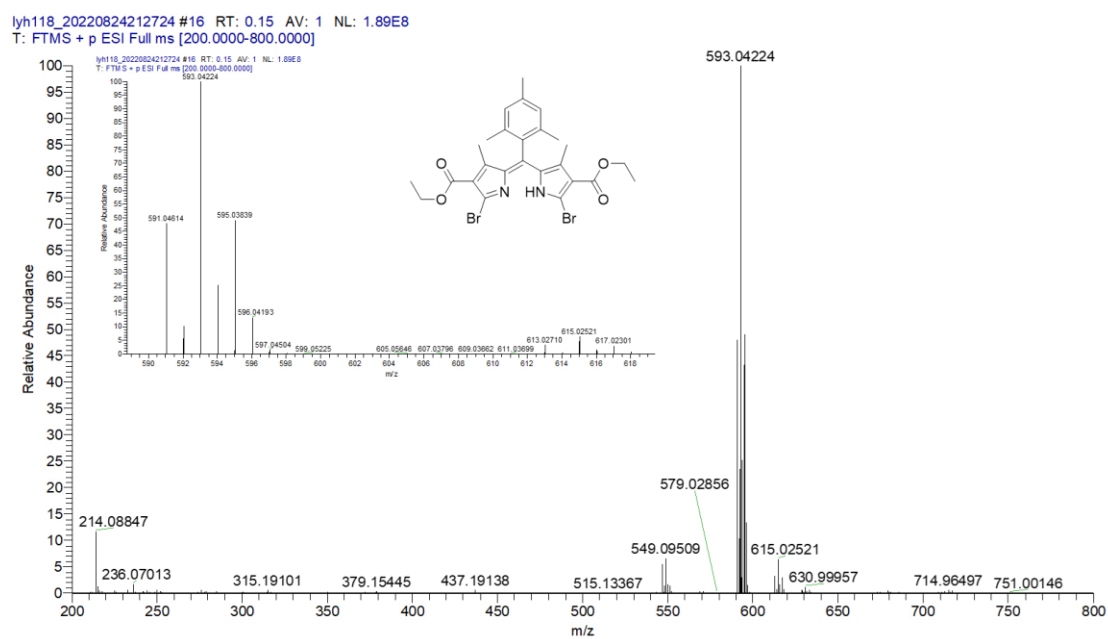

Figure S4. ESI-MS spectra of 2

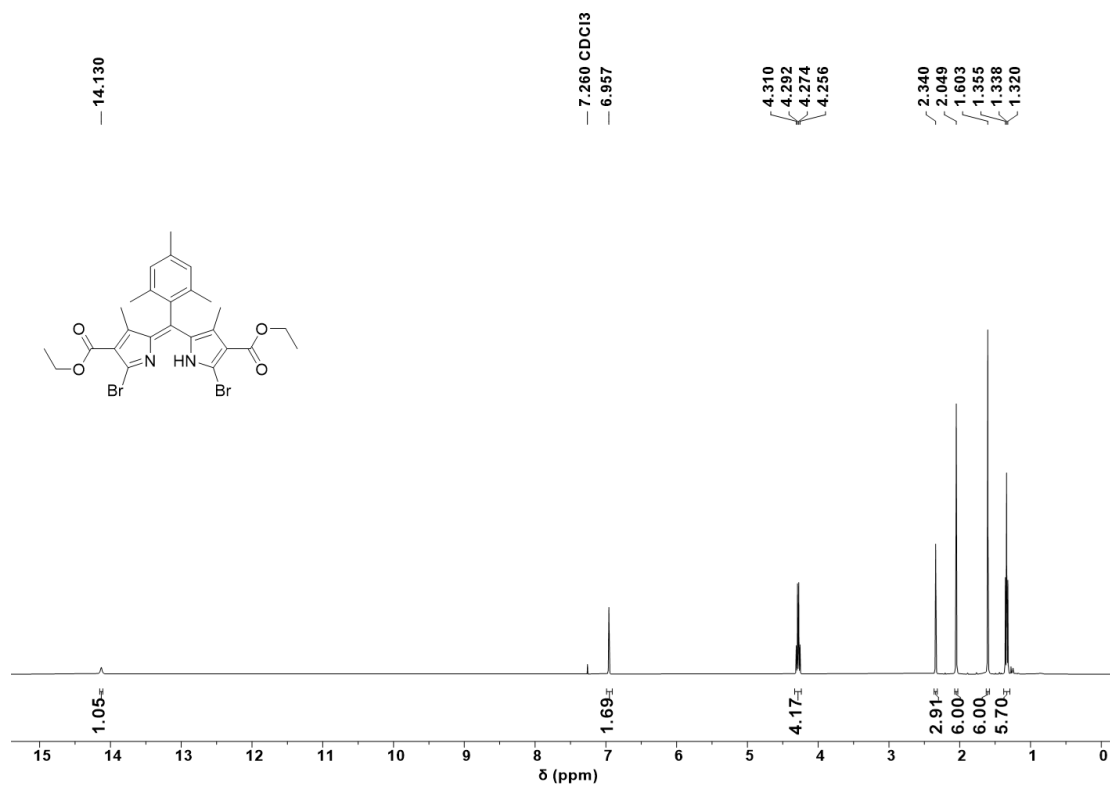

**Figure S5.** <sup>1</sup>H NMR spectra of **2**

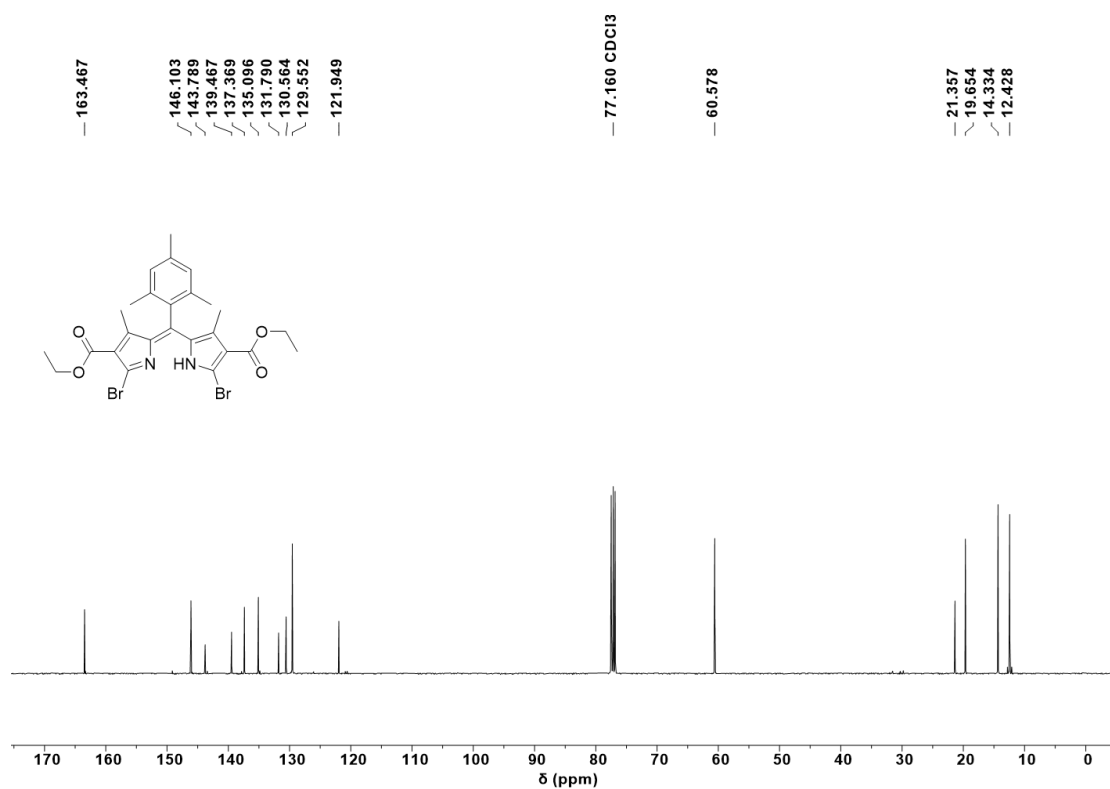

**Figure S6.** <sup>13</sup>C NMR spectra of **2**

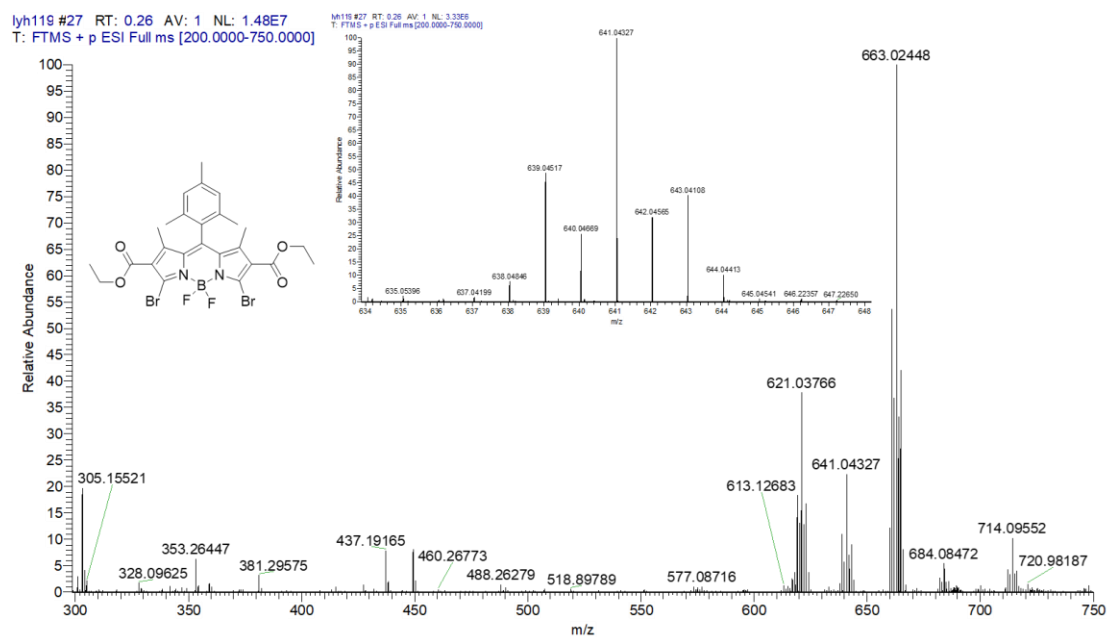

Figure S7. ESI-MS spectra of **3**

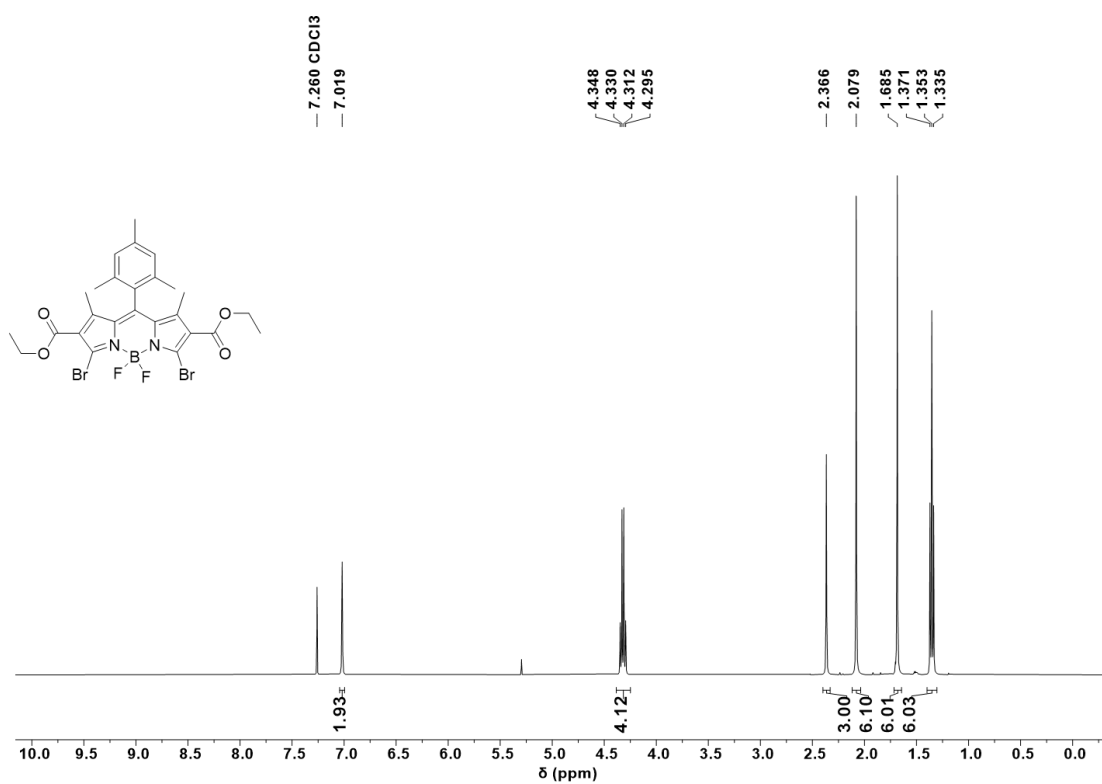

Figure S8. <sup>1</sup>H NMR spectra of **3**

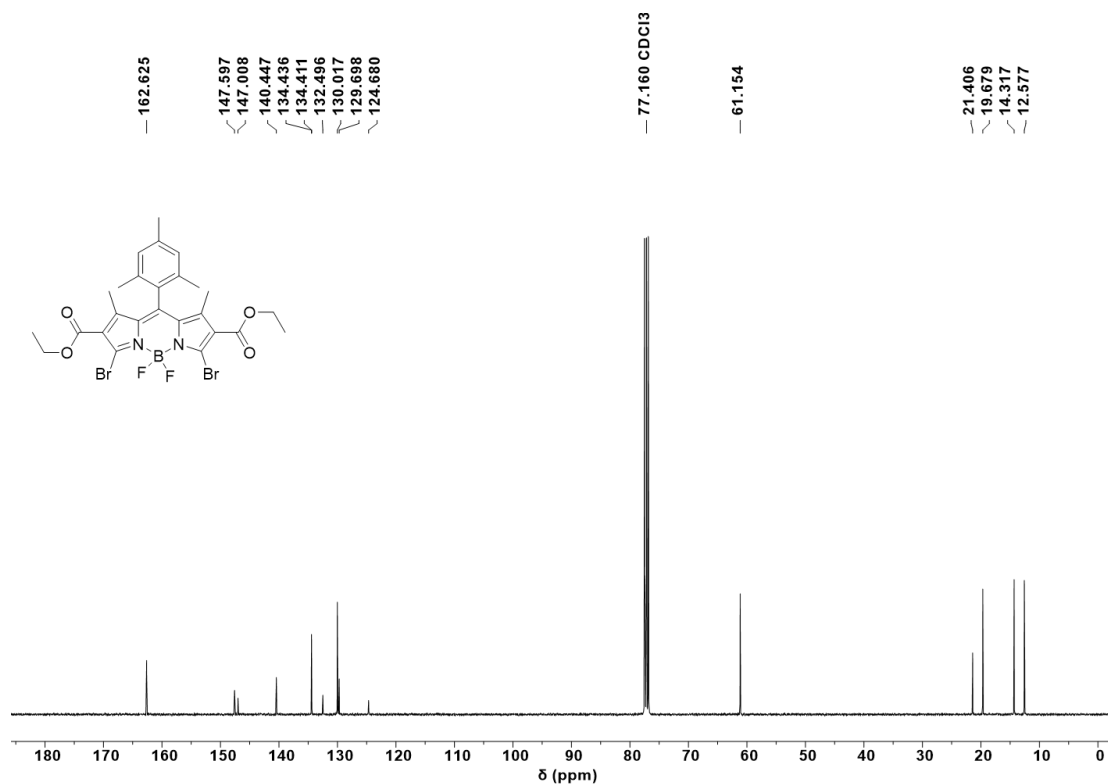

Figure S9. <sup>13</sup>C NMR spectra of 3

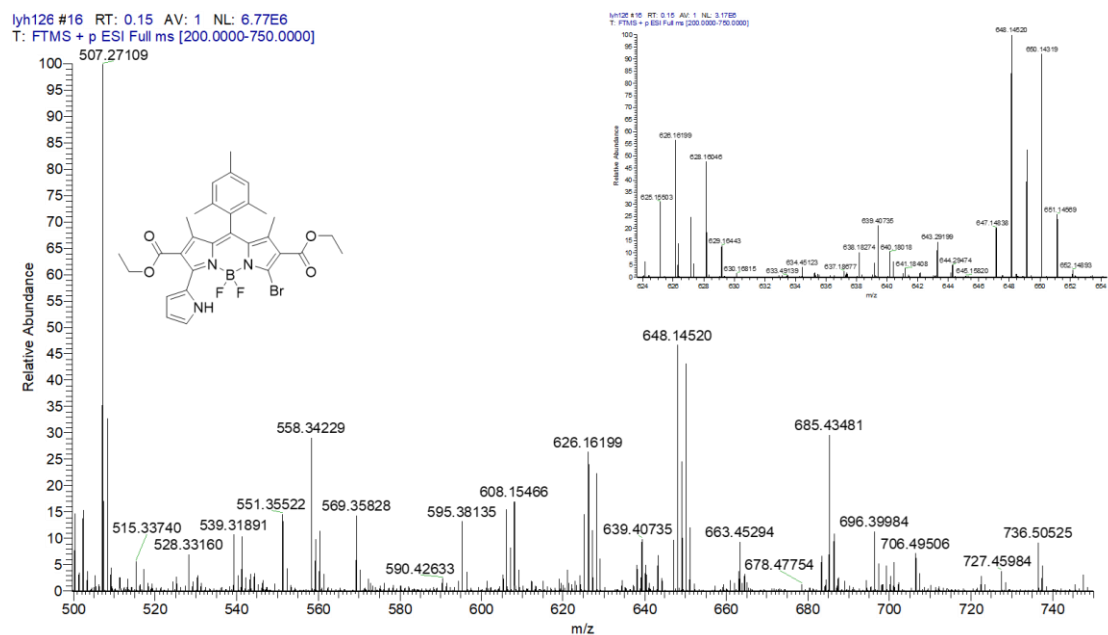

Figure S10. ESI-MS spectra of 4

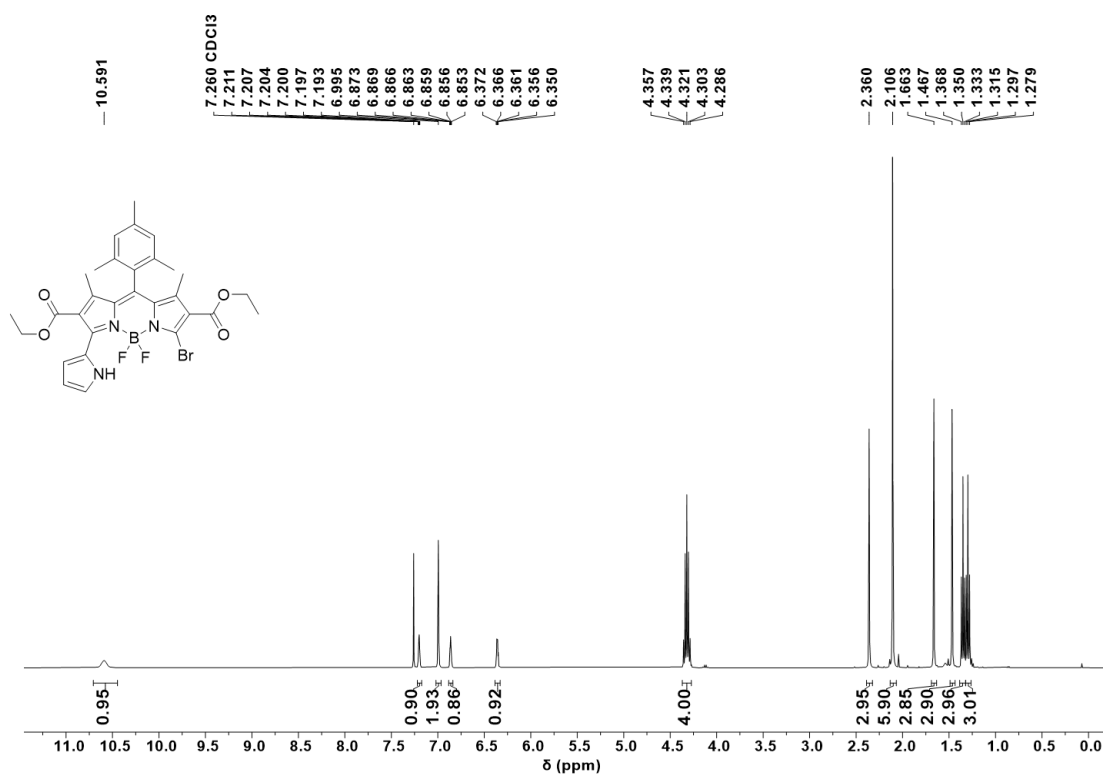

Figure S11. <sup>1</sup>H NMR spectra of 4

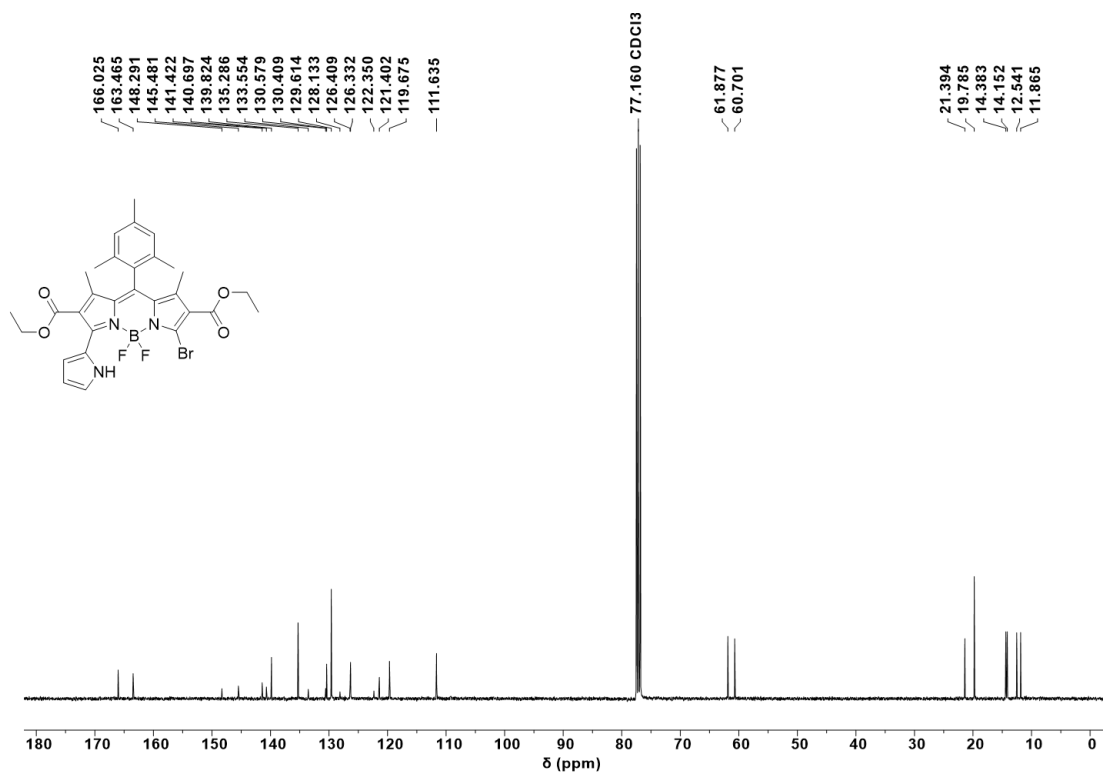

Figure S12. <sup>13</sup>C NMR spectra of 4



lyh130 #17 RT: 0.18 AV: 1 NL: 3.79E7  
T: FTMS + p ESI Full ms [200.0000-1600.0000]

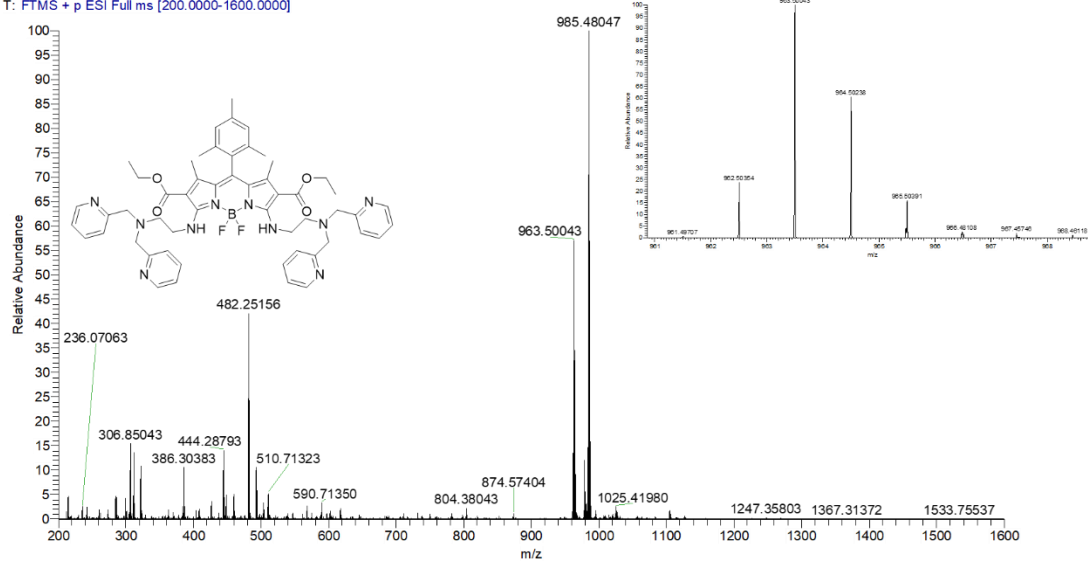

Figure S13. ESI-MS spectra of BDP-2BPEA

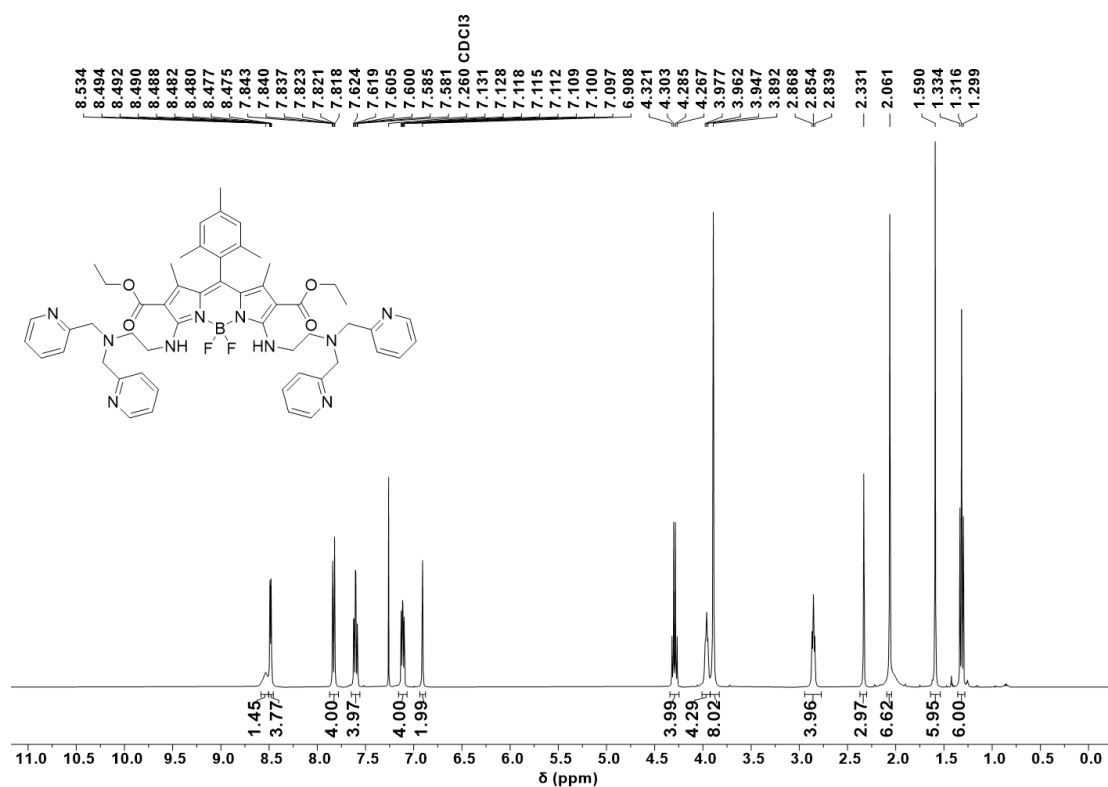

Figure S14.  $^1\text{H}$  NMR spectra of BDP-2BPEA

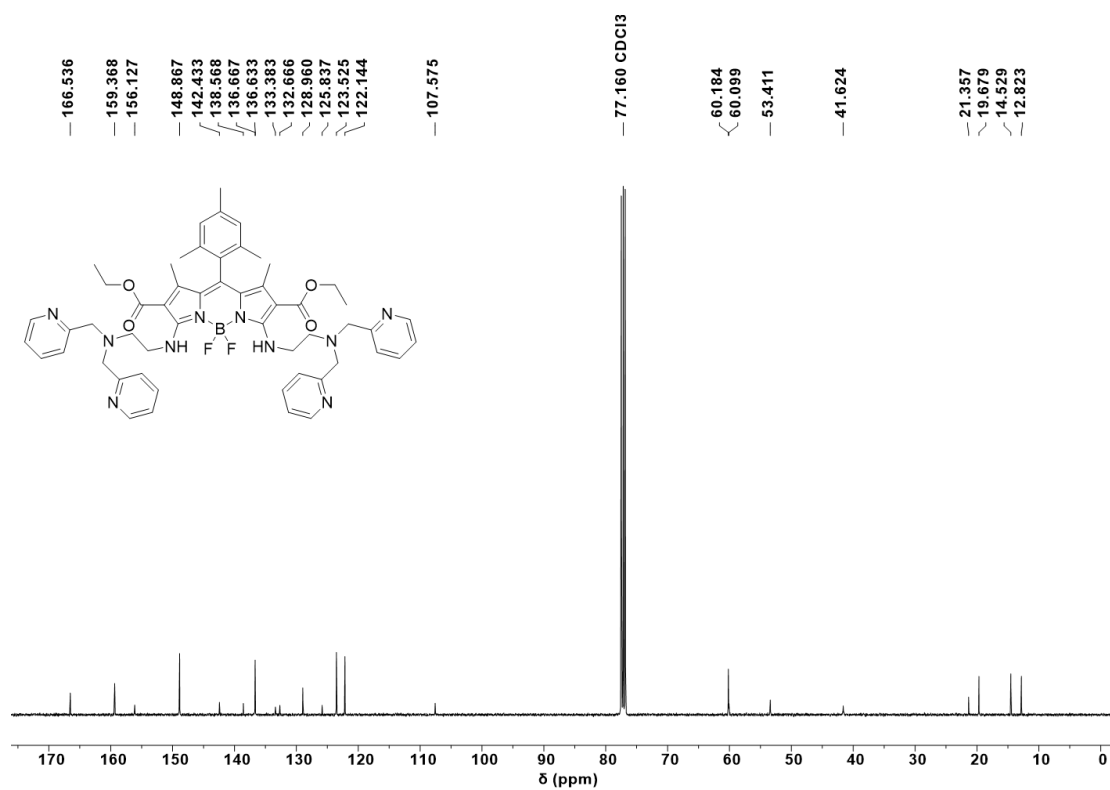

Figure S15. <sup>13</sup>C NMR spectra of BDP-2BPEA

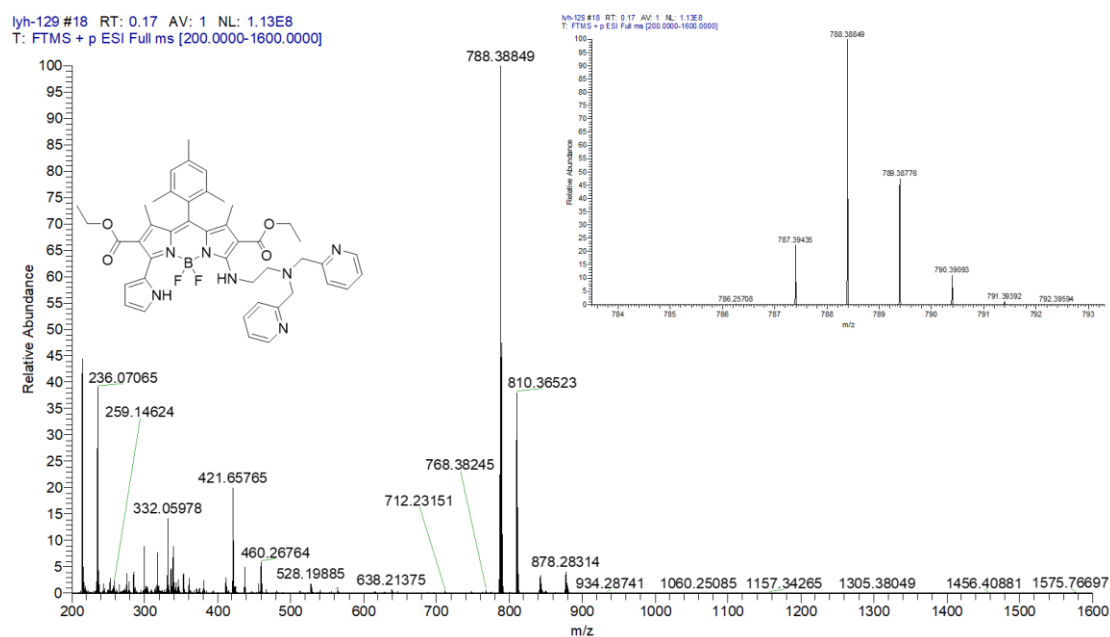

Figure S16. ESI-MS spectra of BDP-p-BPEA

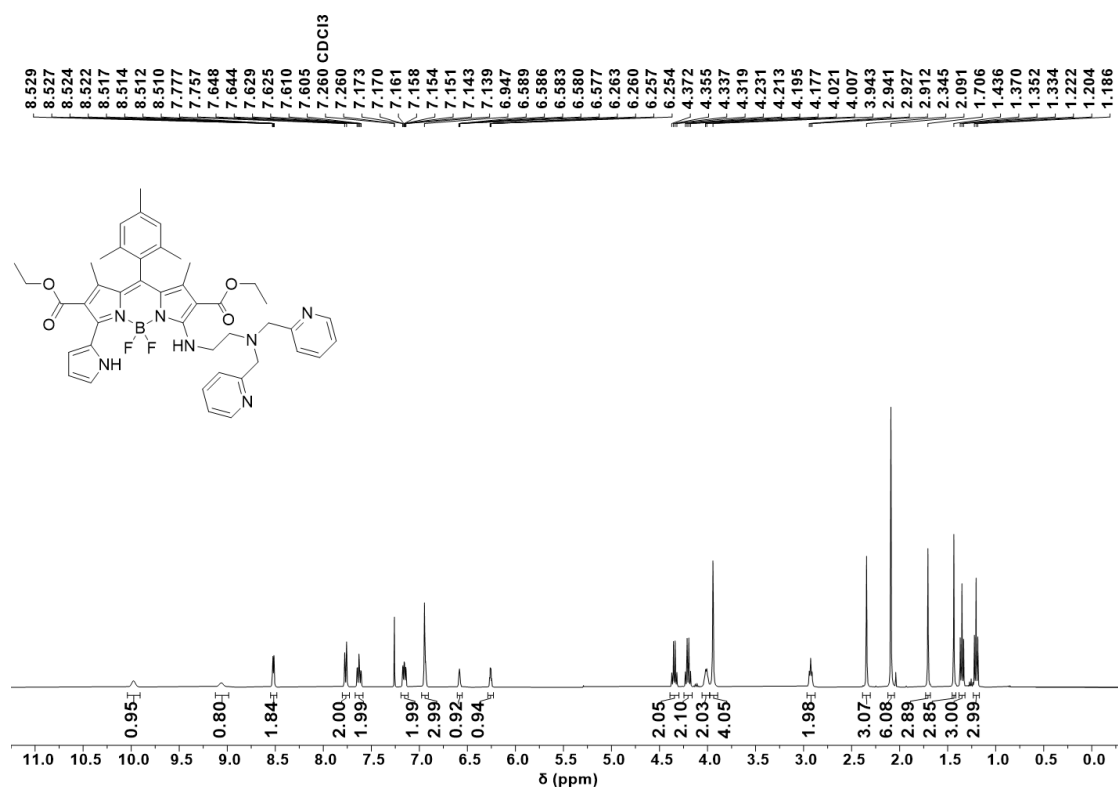

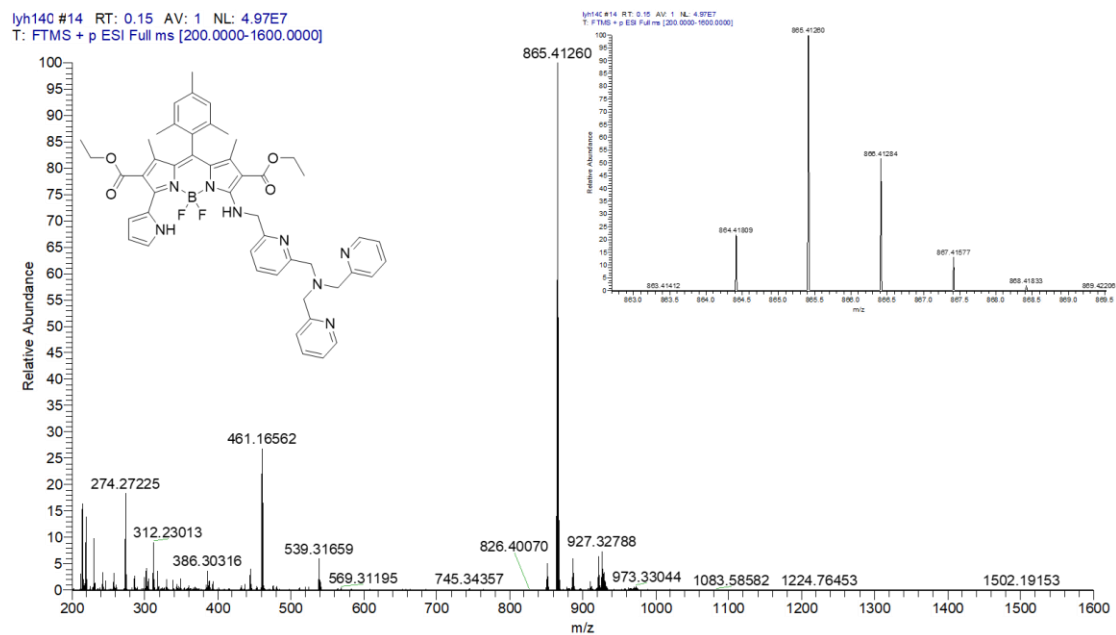

Figure S19. ESI-MS spectra of BDP-p-TMPA

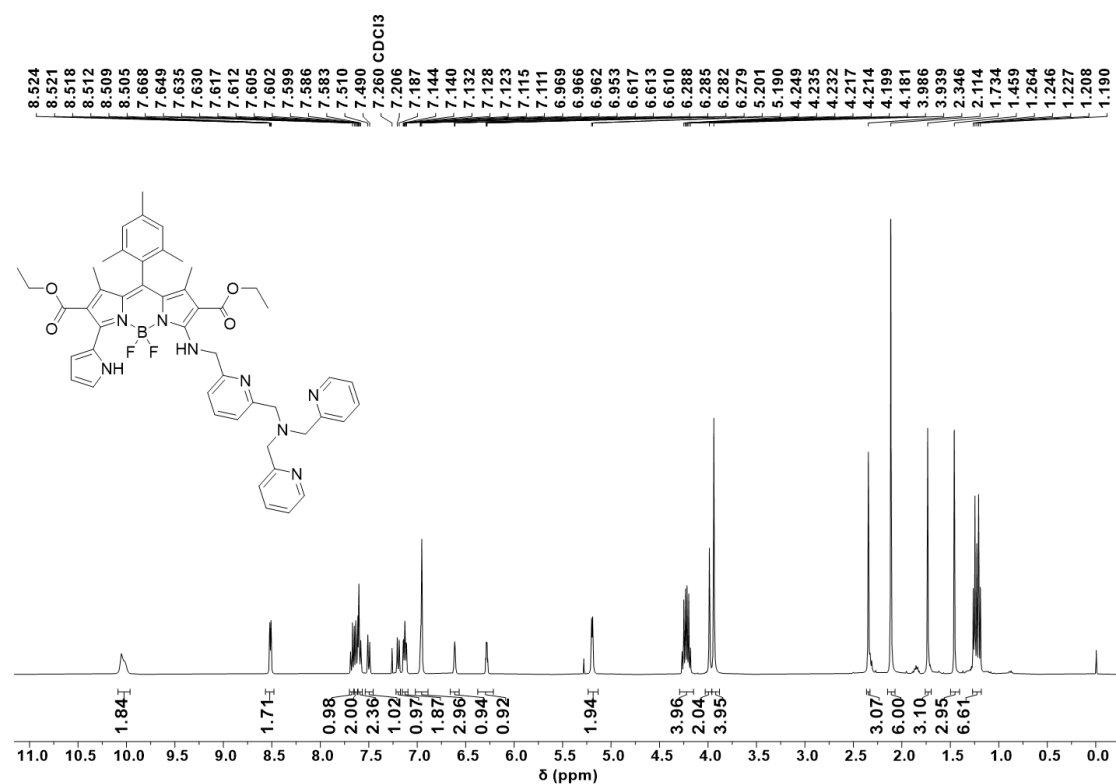

Figure S20. <sup>1</sup>H NMR spectra of BDP-p-TMPA

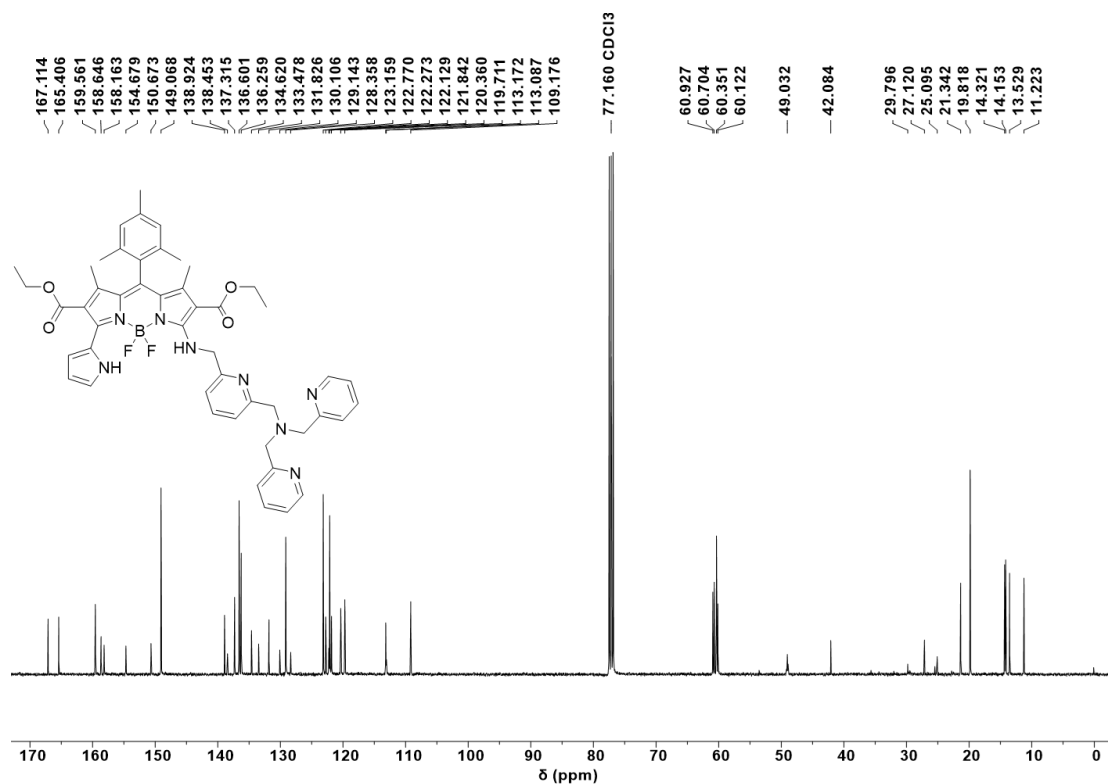

Figure S21. <sup>13</sup>C NMR spectra of BDP-p-TMPA

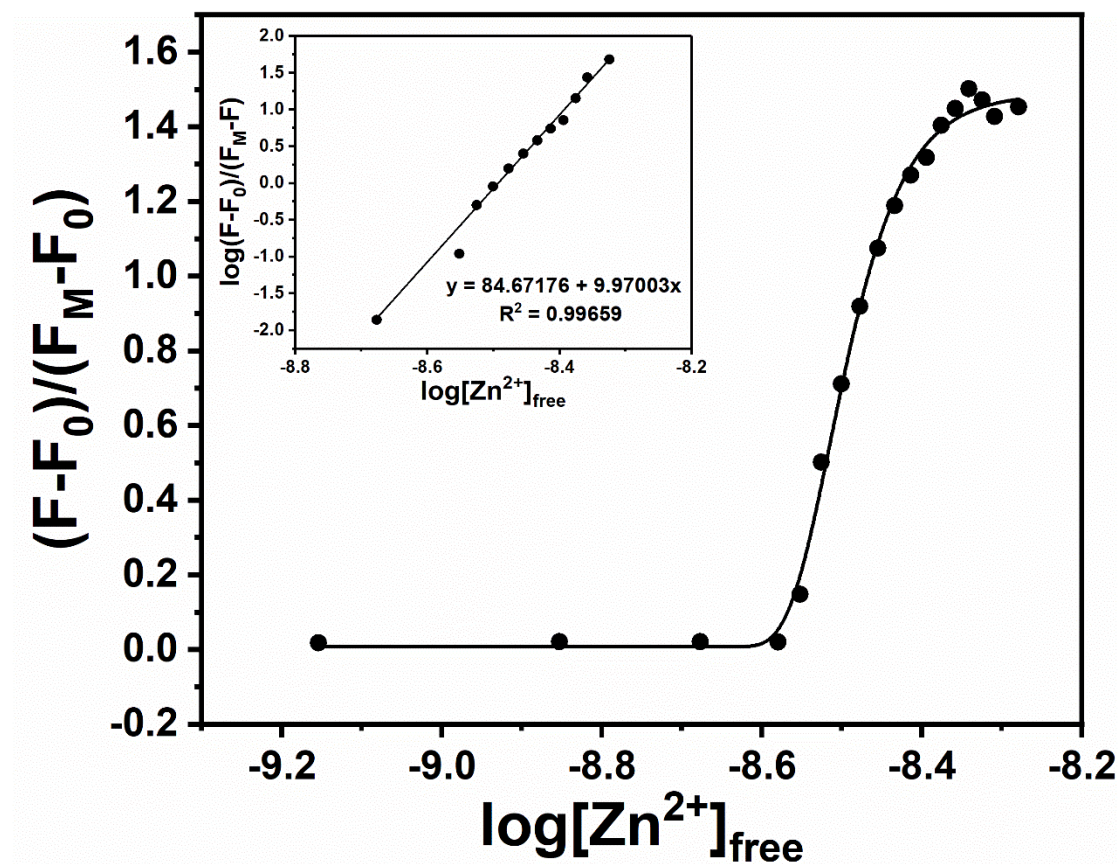

Figure S22. The Hill plot of BDP-p-BPEA complexation with Zn<sup>2+</sup>

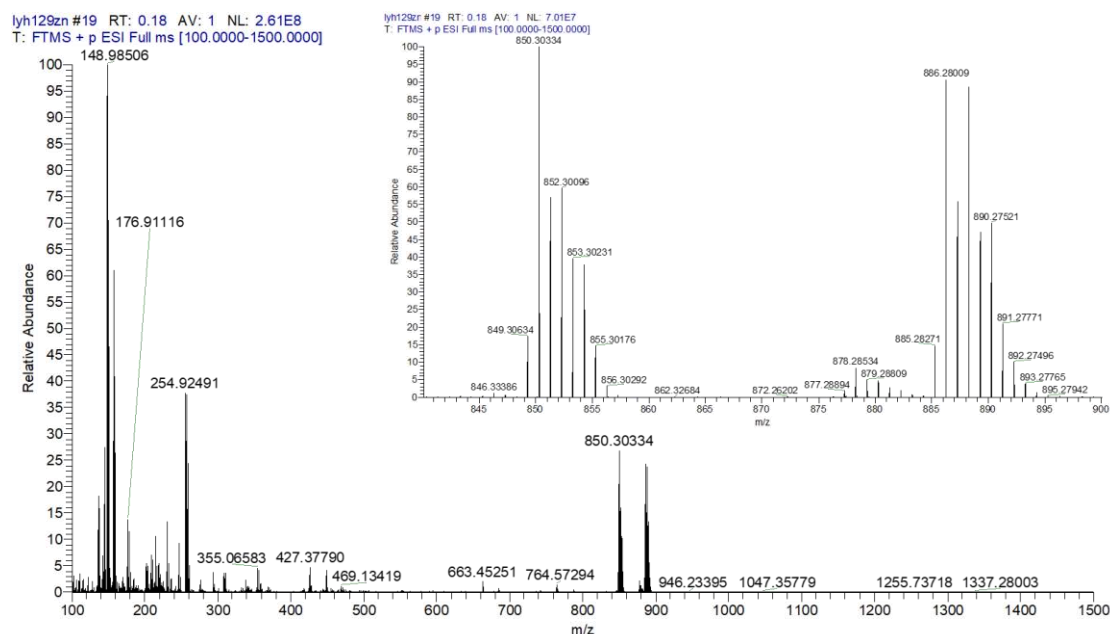

**Figure S23.** ESI-MS spectra of **BDP-p-BPEA** +  $\text{Zn}^{2+}$

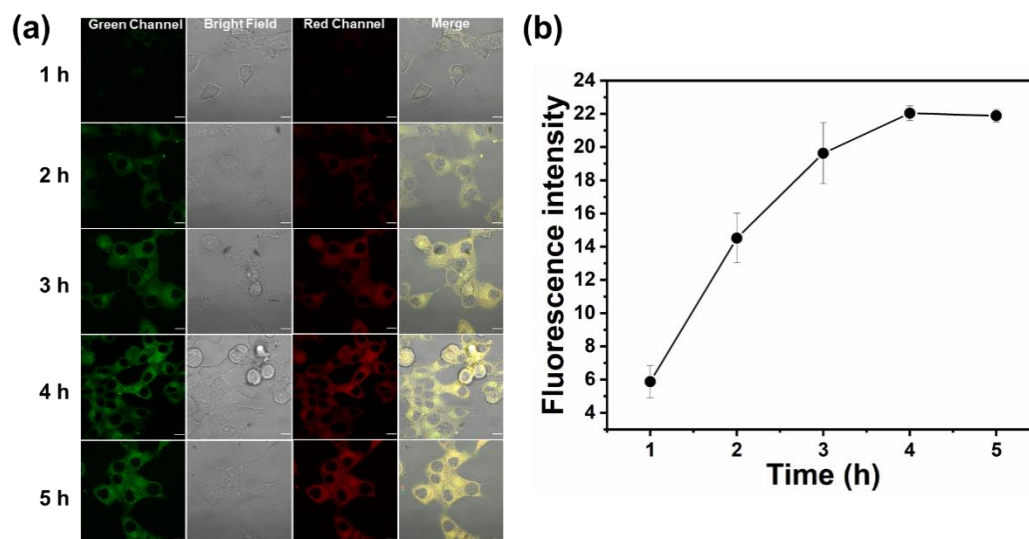

**Figure S24.** (a) Confocal imaging of HeLa cells treated by **BDP-p-BPEA** for 1-4 hours; (b) Average fluorescence intensity of cells in green channel of each graph. Green channel = 570-615 nm, red channel = 650-720 nm, scale bar: 10  $\mu\text{m}$ .

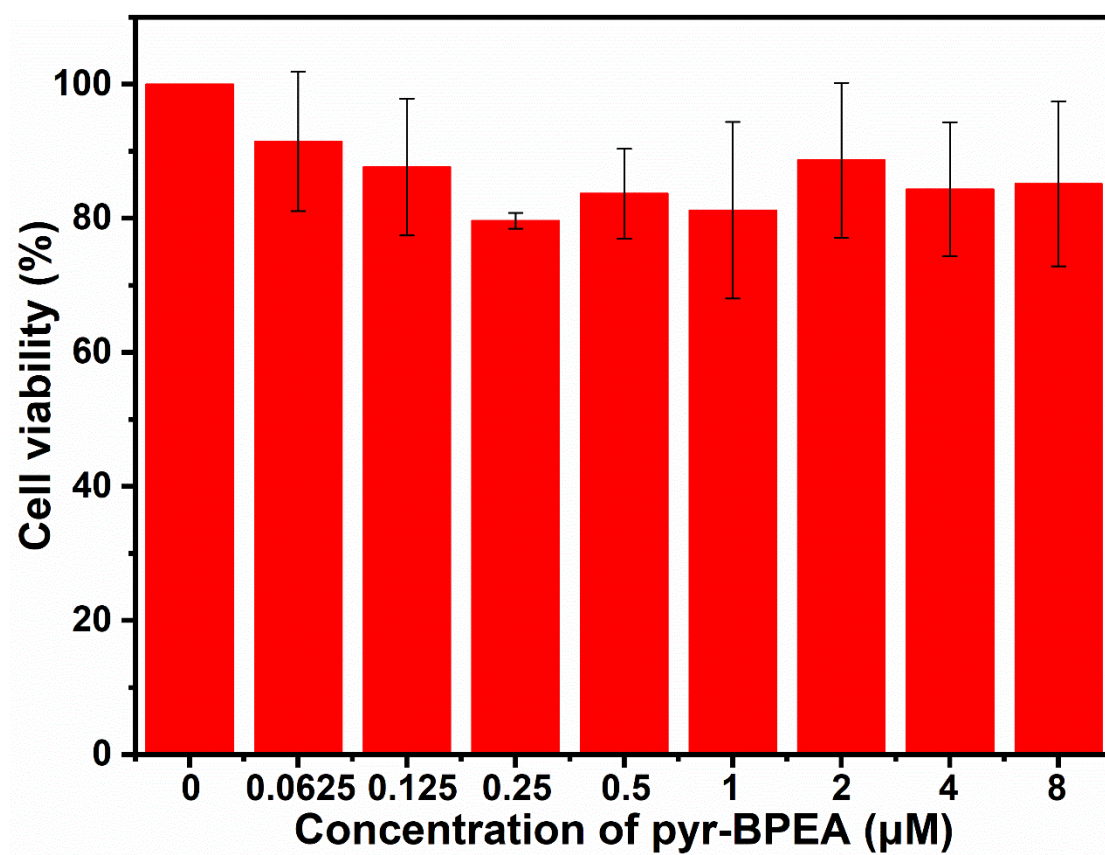

**Figure S25.** Viability of HeLa cells versus the concentration of **BDP-p-BPEA**
